# Supplementary material
Source: Springer Nature journal article supplement (https://www.springermedizin.de/resource/supplementary/13058_2010_2537_MOESM4_ESM.pdf/9701644)

**(a)****BRCA1**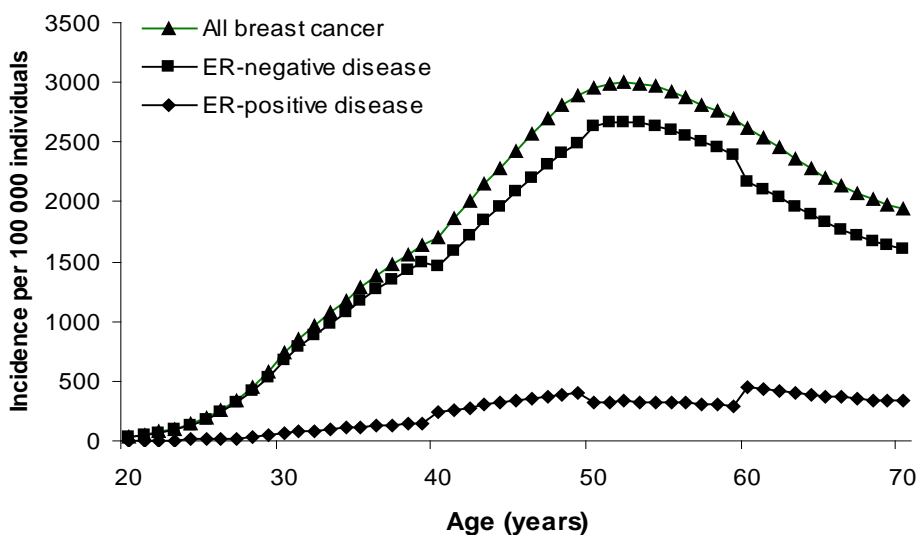**(b)****BRCA2**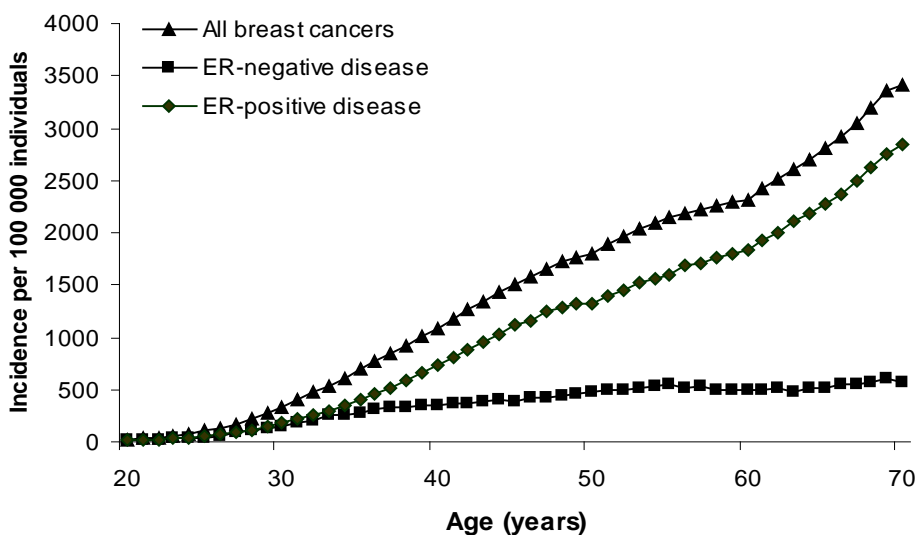**(c)****non-carriers**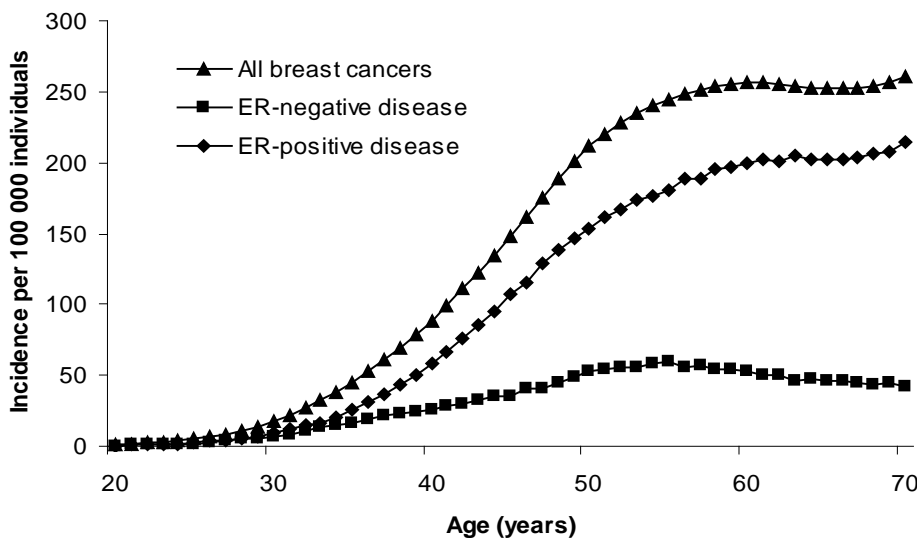

Supplement: MOESM4 [file 9701644]
